# 1        Within host selection for faster replicating bacterial 2        symbionts

3        Ewa Chrostek<sup>1,2</sup> and Luis Teixeira<sup>1,3\*</sup>

4

5        1 Instituto Gulbenkian de Ciência, Oeiras, Portugal

6        2 Current Address: Max Planck Institute for Infection Biology, Berlin, Germany

7        3 Faculdade de Medicina da Universidade de Lisboa, Lisboa, Portugal

8

9        \* Corresponding author:

10        E-mail: [lteixeira@igc.gulbenkian.pt](mailto:lteixeira@igc.gulbenkian.pt)

11

## 12        **Abstract**

13        *Wolbachia* is a widespread, intracellular symbiont of arthropods, able to induce  
14        reproductive distortions and antiviral protection in insects. *Wolbachia* can also be  
15        pathogenic, as is the case with *wMelPop*, a virulent variant of the endosymbiont of  
16        *Drosophila melanogaster*. An extensive genomic amplification of the 20kb region  
17        encompassing eight *Wolbachia* genes, called Octomom, is responsible for *wMelPop*  
18        virulence. The Octomom copy number in *wMelPop* can be highly variable between  
19        individual *D. melanogaster* flies, even when comparing siblings arising from a single  
20        female. Moreover, Octomom copy number can change rapidly between generations.  
21        These data suggest an intra-host variability in Octomom copy number between  
22        *Wolbachia* cells. Since *wMelPop Wolbachia* with different Octomom copy numbers  
23        grow at different rates, we hypothesized that selection could act on this intra-host  
24        variability. Here we tested if total Octomom copy number changes during the lifespan

25 of individual *Drosophila* hosts, revealing selection for different *Wolbachia*  
26 populations. We performed a time course analysis of Octomom amplification in flies  
27 whose mothers were controlled for Octomom copy number. We show that despite the  
28 Octomom copy number being relatively stable it increases slightly throughout *D.*  
29 *melanogaster* adult life. This indicates that there is selection acting on the intra-host  
30 variation in the Octomom copy number over the lifespan of individual hosts. This  
31 within host selection for faster replicating bacterial symbionts may be in conflict with  
32 between host selection against highly pathogenic *Wolbachia*.

33

## 34 **Introduction**

35 Gene copy number variation is one of the mechanisms allowing rapid evolution  
36 across the tree of life [1–3]. In bacteria, growth inhibition by nutrient limitation or  
37 antibiotic presence may be overcome by increasing copy number of genes  
38 functionally related to these challenges [4]. Moreover, amplified genomic regions  
39 allow accumulation of mutations without the risk of loss of the original function. This  
40 can lead to the generation of more beneficial variants and subsequent loss of extra  
41 copies or repurposing of the new copies for a new function [4]. Thus, genomic  
42 amplifications generate extensive and reversible genetic variation, which can either  
43 increase the fitness of an individual directly or be a substrate on which adaptive  
44 evolution can act.

45 We have previously found that a genomic amplification affects the biology of the  
46 intracellular, maternally transmitted bacterium *Wolbachia* [5]. *Wolbachia* is a  
47 widespread endosymbiont of insects, causing an array of phenotypes, including  
48 reproductive manipulations [6] and antiviral protection [7,8]. Moreover, some  
49 *Wolbachia* strains can strongly reduce the host lifespan. This was first described for

50 *wMelPop*, a laboratory *Wolbachia* variant, in *Drosophila melanogaster* [9]. The  
51 Octomom genomic region, which contains eight *Wolbachia* genes, is amplified in  
52 *wMelPop*, while it is present as a single copy in closely related non-pathogenic  
53 *Wolbachia* variants [10,11]. The number of copies of this region varies greatly  
54 between individual *wMelPop*-infected flies from the same population, ranging from  
55 two to ten copies [5]. We have previously established *D. melanogaster* lines carrying  
56 defined and different Octomom copy numbers and observed that the higher the  
57 Octomom copy number, the higher *Wolbachia* levels and the shorter the lifespan of its  
58 *D. melanogaster* host [5]. Moreover, a *wMelPop* that reverted to carrying only one  
59 Octomom copy proliferates at the same rate as the control *wMelCS\_b* variant and is  
60 not pathogenic [5]. Thus, we identified Octomom copy number as a pathogenicity  
61 determinant of *wMelPop* [5].

62 The high variation in Octomom copy numbers between individual flies can also  
63 be observed in the progeny of single *wMelPop*-carrying females [5]. This variation  
64 between siblings could be explained by *Wolbachia* variation within a female and  
65 differential symbiont assortment to the progeny. The fact that the variability  
66 decreased under selection argues for initial high variation within single flies, which is  
67 pruned over a few generations of selection for either the highest or the lowest  
68 Octomom copy number. However, even under constant selection some variation was  
69 either maintained or continuously generated, since reversing the direction of the  
70 selection or relaxing it could rapidly change the Octomom copy numbers in these  
71 lines [5].

72 We hypothesized that variation in Octomom copy number between *Wolbachia*  
73 cells within an individual host could lead to a differential growth of these cells. If  
74 *Wolbachia* cells with higher Octomom copy number proliferate more, their frequency

75 in the pool of *Wolbachia* within a host will increase over time, and the average  
76 Octomom copy number of the within-host population increases over the host lifespan.  
77 We tested this hypothesis through a time course analysis of Octomom copy number in  
78 individual *w*MelPop flies originating from mothers with controlled Octomom copy  
79 number.

80

## 81 **Results**

82 We examined the stability of Octomom copy number over the adult life (from  
83 eclosion to the onset of high mortality) in single *w*MelPop-carrying *D. melanogaster*  
84 (Fig 1A). The flies were the offspring of parents carrying *w*MelPop with low  
85 Octomom copy number (median of 4.5 Octomom copies, range from 4 to 5.5) or high  
86 Octomom copy number (median of 9.5, range from 8.5 to 11.5). The low Octomom  
87 cohort had, on average, 5.45 (standard deviation, SD = 0.82) Octomom copies per  
88 genome and the high Octomom cohort had an average of 10.29 (SD = 1.90) Octomom  
89 copies per genome. The fitted generalized additive model (GAM) clearly shows an  
90 increase in Octomom copy number in the first few days (six to eight days), which  
91 subsequently levels off at the later timepoints (Fig 1A and B). The trend is highly  
92 significant (the smooth term for time,  $p < 0.001$ ). This shows that Octomom copy  
93 number in the *w*MelPop population increases during most of the adult host lifespan.

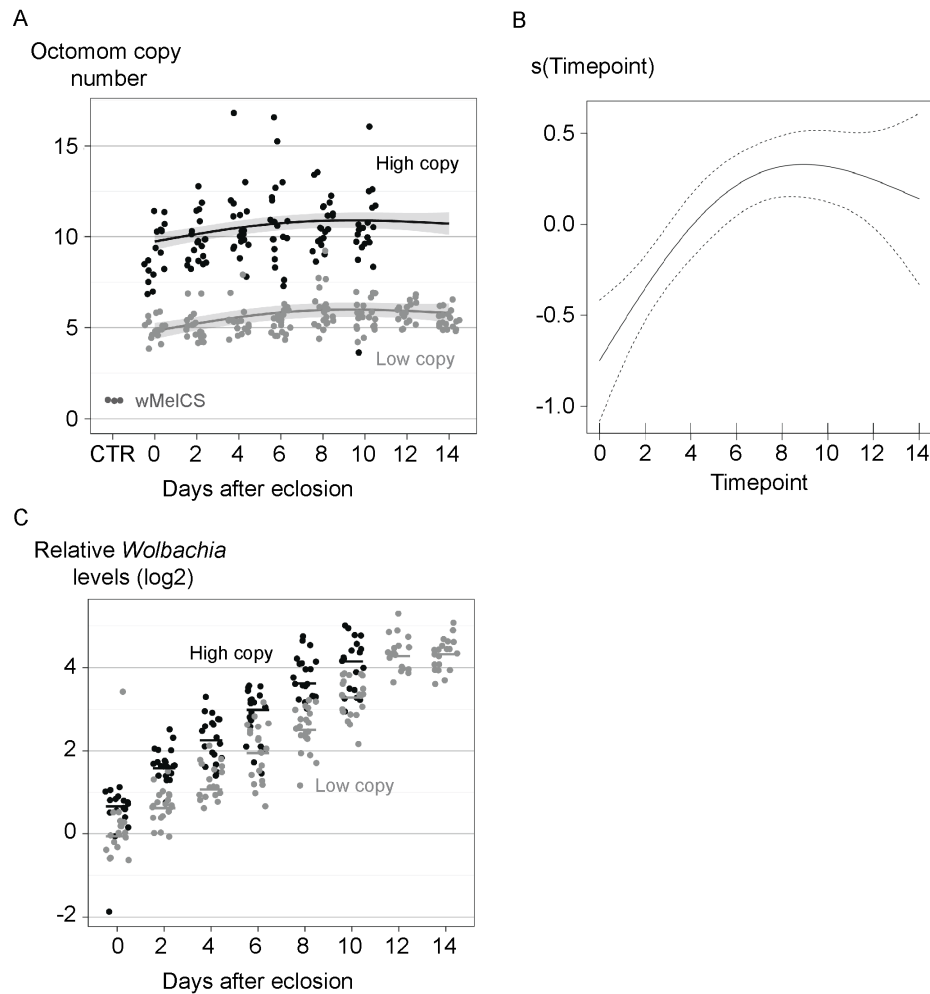

94

95 **Figure 1. Octomom copy number and *Wolbachia* levels during adult *D. melanogaster* life.** (A)

96 Each dot represents *WD0513* genomic levels in a single fly, as we have previously shown that this gene

97 can be used to estimate Octomom region copy number [5]. The values were obtained using the Pfaffl

98 method with *wsp* as a reference gene and calibrated using the median of three samples of control

99 *wMelCS\_b* flies (CTR). The lines represent the fit of the generalized additive model (GAM) and

100 shaded area - the 95% confidence interval. (B) Fitted GAM smooth of Octomom copy number in

101 response to the age of adults. The 95% confidence interval is indicated by the dashed lines. Note the Y-

102 axis is standardized so that average is zero. (C) Each dot represents *wsp* levels in a single fly. Lines are

103 medians of the replicates. *wsp* levels were obtained using Pfaffl method with *Rp132* as a reference gene

104 and calibrated using the median of the low copy number samples at time zero. (A) and (C) represent

105 data from single females derived from the 3<sup>rd</sup> generation of selection for Octomom copy number in the

106 DrosDel isogenic *w<sup>1118</sup>* genetic background [5]. Females were raised and kept at 25°C (survival of their

107 siblings is shown in Fig. S5A of [5]). Supporting data can be found in S1 Data.

108

109 In parallel, we tested *Wolbachia* titer in the same flies. *Wolbachia* levels increase  
110 with the age of flies (log-linear mixed-effect model (lme),  $p < 0.001$ ) and flies  
111 carrying *wMelPop* with higher Octomom copy numbers have 1.85 times higher  
112 *Wolbachia* levels compared to flies carrying *wMelPop* with lower Octomom copy  
113 numbers (lme,  $p < 0.001$ ), confirming previous results (Fig 1C). However, we do not  
114 see a significant interaction between cohort and growth rate (lme,  $p = 0.102$ ). We also  
115 tested if Octomom copy number could be an explanatory variable for *Wolbachia*  
116 levels within each cohort. This variable was not significant (lme,  $p = 0.48$ ).

117

## 118 Discussion

119 By analyzing cohorts of individuals from mothers carrying *Wolbachia* with  
120 controlled Octomom copy number we observed that Octomom copy number is  
121 relatively stable over the life of the host. However, we detected a small, but clear and  
122 statistically significant, increase in Octomom copy number over time in the first six to  
123 eight days of the adult *D. melanogaster* life. This could be explained by selection  
124 acting on the heterogeneity of *wMelPop* copy number between *Wolbachia* cells within  
125 a single host. Since bacteria with higher copy numbers grow faster over time, they  
126 contribute more to the total pool of *wMelPop* in an older fly and therefore increase  
127 total Octomom copy number. In our dataset, the Octomom copy number stops  
128 increasing at the last days of the host life. This is surprising and could be explained by  
129 the initial heterogeneity in the flies being reduced in the course of selection. If  
130 *Wolbachia* cells with the maximal Octomom copy number within each fly reach a  
131 very high frequency or are fixed, there is no genetic variation for selection to act on,

132 and the Octomom copy number does not continue to increase. Alternatively, the  
133 differential fitness between *Wolbachia* harboring different Octomom copy numbers  
134 may decrease with the age of the fly, weakening the strength of the selection and  
135 preventing continuous Octomom copy number growth.

136       Importantly, our data indicate that the selective pressures acting on *wMelPop*  
137 within and between hosts are different. Within a host, there may be a selection for  
138 *Wolbachia* that grow fast. On the other hand, competition between flies could select  
139 for *Wolbachia* that grow slower and have a lower cost for the host [5]. These  
140 opposing selective pressures may play a role in shaping the evolution of *Wolbachia* in  
141 natural populations.

142       Although the results presented here are compatible with our prediction of within  
143 host heterogeneity and selection, other forces may contribute to the changes in  
144 Octomom copy number during host lifespan. Amplification and deletion of Octomom  
145 copies may also occur throughout *wMelPop* host's adult life. The rates of these two  
146 opposing mutations will determine an overall tendency of Octomom copy number to  
147 increase or decrease over time. Therefore, the dynamics of Octomom copy number  
148 changes may be the combination of selection and mutation. A mutation bias for  
149 deletion of Octomom copies could temper the effect of selection for higher Octomom  
150 copy numbers. On the other hand, a bias for amplification could explain the observed  
151 increase in Octomom copy number, even in the absence of selection. Nonetheless, this  
152 would also result in an increased proportion of more pathogenic *wMelPop* with host  
153 age. The influence of mutation and selection on Octomom copy number change  
154 during host lifespan may vary with intrinsic and extrinsic factors. For instance,  
155 mutation bias towards amplification or deletion could change with Octomom copy

156 number itself. On the other hand, since temperature has a strong effect on *wMelPop*  
157 pathogenicity [9,12], it may also affect the differential growth of *Wolbachia* with  
158 different Octomom copy numbers and, therefore, within host selection on this trait. A  
159 mechanistic understanding of how Octomom copy number changes and influences  
160 *Wolbachia* phenotype and which factors modulate it will help disentangling the  
161 relative contribution of selection and mutation to Octomom copy number changes  
162 during *D. melanogaster* life.

163 *Wolbachia* with higher Octomom copy number proliferate more and are more  
164 pathogenic to their hosts [5]. The within host selection for bacteria that proliferate  
165 more and have a higher potential of being deleterious to the host may be a common  
166 phenomenon. For instance, *Staphylococcus aureus* variants that cause blood or deep  
167 tissue infection are, in the majority, the result of within-host selection from non-  
168 pathogenic nose colonizing variants [13]. The adaptations conferring high virulence  
169 identified in this study do not favor *S. aureus* dissemination and onward transmission  
170 (discussed in [13]). Thus, the selective pressure acting on the bacteria within a single  
171 host may be in conflict with the selective pressure acting on the entire bacterial  
172 population. This implies that although the more pathogenic bacterial variants arise  
173 throughout the life of the hosts, they are constantly purged from the overall bacterial  
174 population by selection either on the fitness of the host (vertically transmitted  
175 symbionts) or on the bacterial transmission capacity (horizontally transmitted  
176 symbionts).

177 A recent report suggested that *wMelPop* Octomom copy numbers change  
178 drastically during *D. melanogaster* lifespan, increasing more than two-fold in the first  
179 ten days of adult life and then decreasing more than four-fold over the next thirty days



180 [14]. These results differ from the ones we present here and may be explained by the  
181 lack of experimental control for the Octomom copy number in these flies and  
182 determination of the Octomom copy numbers after the onset of mortality. Using data  
183 from Chrostek and Teixeira 2015 [5] we constructed a model showing that in a mixed  
184 population of flies the differential growth of *Wolbachia* with different Octomom copy  
185 numbers, combined with differential death of flies carrying *Wolbachia* with different  
186 Octomom copy numbers, leads to initial increase in Octomom copy number, followed  
187 by a decrease due to death of the flies carrying *Wolbachia* with higher Octomom copy  
188 number at the host population level [15].

189 Here we confirmed that *wMelPop* with higher Octomom copy number has higher  
190 *Wolbachia* titers, supporting our conclusion that this amplification controls *wMelPop*  
191 levels. However, the difference in growth rate between these lines was not statistically  
192 significant. This may be due to the high variability in the data and the differential  
193 growth between these lines being potentially small. We have previously shown  
194 different growth rates between *wMelPop* carrying one and two copies of Octomom  
195 and between these and *wMelPop* carrying 12 or 15 copies [5]. However, the growth  
196 rate of *wMelPop* carrying 12 and 15 copies was not significantly different [5]. This  
197 indicates that the relationship between growth rate and Octomom copy number is not  
198 linear and that differences in *wMelPop* carrying higher copy numbers may have a  
199 smaller impact on growth. Therefore, the difference in growth between *wMelPop*  
200 carrying five and ten copies may indeed be small. The difference in *Wolbachia* titers  
201 despite the lack of measurable difference in the growth rate might be the result of the  
202 cumulative effect of small growth rate differences throughout the fly development  
203 from egg to adult, the result of a differential growth rate at different development

204 stages, or even the accumulation of small differences in growth for more than one  
205 generation.

206 The labile nature of the Octomom amplification and the resulting phenotypes of  
207 this amplification make *wMelPop* an interesting case study to understand genome  
208 dynamics and selective forces acting on endosymbionts. This system may be further  
209 used in the future to reveal general principles in host-bacteria symbiosis.

210

## 211 **Material and methods**

### 212 **Fly strains**

213 *D. melanogaster* DrosDel isogenic background (*iso*) flies with *wMelCS\_b* and  
214 *wMelPop* were described before [5,10]. Selection on *D. melanogaster* lines carrying  
215 *wMelPop* with different Octomom copy number was described in [5].

216

### 217 **Experimental setup for time-course analysis of *WD0513*** 218 **and *Wolbachia* levels**

219 Female progeny of females from the 3<sup>rd</sup> generation of selection for Octomom  
220 copy number in the *D. melanogaster* DrosDel isogenic background (*iso*) [5] was  
221 collected at eclosion (ten females per tube), allowed to mate with brothers for 24 h  
222 (five males per tube), separated from males, and 20 females were sacrificed every  
223 second day for *WD0513* and *Wolbachia* density quantification. Females were  
224 maintained at 25°C on a standard cornmeal diet without live yeast and were passed to  
225 fresh vials every 3 days. We sampled only until the onset of high mortality in the  
226 different lines in order to avoid sampling bias for surviving, low Octomom copy  
227 number bearing flies.

228

## 229 **DNA extractions**

230 DNA was extracted from single flies (wMelPop) or pools of ten flies (wMelCS\_b  
231 controls). Each fly or pool of flies was squashed in 250 µl of 0.1 M Tris HCl, 0.1 M  
232 EDTA, and 1% SDS (pH 9.0) and incubated 30 min at 70°C. Next, 35 µl of 8 M  
233 CH<sub>3</sub>CO<sub>2</sub>K was added, and samples were mixed by shaking and incubated on ice for  
234 30 min. Subsequently, samples were centrifuged for 15 min at 13,000 rpm at 4°C, and  
235 the supernatant was diluted 100× for qPCR.

236

## 237 **Real-time quantitative PCR**

238 The real-time qPCR reactions were performed using CFX384 Real-Time PCR  
239 Detection System (Bio-Rad) as described before [5,10]. Each reaction contained 6 µl  
240 of iQ SYBR Green Supermix (Bio-Rad), 0.5 µl of each primer (3.6 mM), and 5 µl of  
241 diluted DNA. We performed two technical replicates for each sample for each set of  
242 primers. Primer sequences were described before [5]. For all three genes assayed:  
243 *Wolbachia* *WD0513* and *wsp*, and *Drosophila* *Rpl32* the following thermal cycling  
244 protocol was applied: 2 min at 50°C, 10 min at 95°C, and 40 cycles of 30 s at 95°C, 1  
245 min at 59°C, and 30 s at 72°C. Melting curves were examined to confirm the  
246 specificity of amplified products. Ct values were obtained using Bio-Rad CFX  
247 Manager software with default threshold settings. Ct values were subjected to a  
248 quality check - samples with standard deviation between technical replicates  
249 exceeding 0.5 for one of the genes were discarded. The experiment spanned six qPCR  
250 plates and three samples of ten wMelCS\_b flies (extracted and aliquoted beforehand  
251 and assayed on every qPCR plate) were used to normalize between plates. Relative  
252 amounts of genes were calculated by the Pfaffl method [16]. To apply the method, the

253 efficiency of each primer set was predetermined in a separate experiment. For relative  
254 Octomom copy number quantification, *WD0513* was the target gene and the single-  
255 copy *wsp* gene was used as a reference. The medians of three samples of pools of ten  
256 wMelCS\_b flies were used as control values for the Pfaffl method. wMelCS\_b has  
257 one copy of the Octomom region in the genome, determined by the coverage analysis  
258 of sequencing data [10]. This sample, with known Octomom copy number, is required  
259 to estimate Octomom copy number of the remaining samples [17]. For *Wolbachia*  
260 quantification, *wsp* was the target gene and *Drosophila Rpl32* gene was used as a  
261 reference. The levels of *wsp* are relative to the median of the samples of the low  
262 Octomom cohort at time zero.

263

## 264 **Statistical analysis**

265 The statistical analysis was performed in R [18]. The script of the analysis is  
266 provided in S1 Text. Graphs were generated using the package ggplot2 [19].

267 Since the temporal trend over time of the number of Octomom copies was not  
268 linear we analyse it by fitting a Generalized Additive Model (GAM, package mgcv in  
269 R [20]). We included time and line as independent variables and PCR plate as a  
270 random effect. The smooth terms for the interaction between time and lines were non-  
271 significant ( $p > 0.114$ ) and were removed from the final model.

272 Analysis of *wsp* levels over time was performed with log-linear mixed-effect  
273 model fits (package lme4 in R [21]). The effect of interaction between factors was  
274 determined by an ANOVA comparing models fit to the data with and without the  
275 interaction.

276

## 277 **Financial Disclosure**

278 LT lab is funded by the Fundação para a Ciência e Tecnologia ([www.fct.pt](http://www.fct.pt)) grant  
279 PTDC/BEX-GMG/3128/2014. EC is supported by EMBO Long Term Fellowship  
280 EMBO ALTF 1497-2015 (<http://www.embo.org>), co-funded by Marie Curie Actions  
281 by the European Commission (LTFCOFUND2013, GA-2013-609409)  
282 ([ec.europa.eu/research/mariecurieactions](http://ec.europa.eu/research/mariecurieactions)). The funders had no role in study design,  
283 data collection and analysis, decision to publish, or preparation of the manuscript.

284

## 285 **Acknowledgments**

286 We thank Tiago Marques for advice on the statistical analysis.

287

## 288 **References**

- 289 1. Ohno S. Evolution by Gene Duplication. Berlin, Heidelberg: Springer Berlin  
290 Heidelberg; 1970. doi:10.1007/978-3-642-86659-3
- 291 2. Bergthorsson U, Andersson DI, Roth JR. Ohno's dilemma: evolution of new  
292 genes under continuous selection. Proc Natl Acad Sci U S A. 2007;104:  
293 17004–9. doi:10.1073/pnas.0707158104
- 294 3. Romero D, Palacios R. Gene Amplification and Genomic plasticity in  
295 Prokaryotes. Annu Rev Genet. 1997;31: 91–111.  
296 doi:10.1146/annurev.genet.31.1.91
- 297 4. Andersson DI, Hughes D. Gene amplification and adaptive evolution in  
298 bacteria. Annu Rev Genet. 2009;43: 167–95. doi:10.1146/annurev-genet-  
299 102108-134805

- 300 5. Chrostek E, Teixeira L. Mutualism breakdown by amplification of Wolbachia  
301 genes. *PLoS Biol.* 2015;13: e1002065. doi:10.1371/journal.pbio.1002065
- 302 6. Werren JH, Baldo L, Clark ME. Wolbachia: master manipulators of  
303 invertebrate biology. *Nat Rev Microbiol.* 2008;6: 741–751.  
304 doi:10.1038/nrmicro1969
- 305 7. Hedges LM, Brownlie JC, O’Neill SL, Johnson KN. Wolbachia and virus  
306 protection in insects. *Science.* 2008;322: 702. doi:10.1126/science.1162418
- 307 8. Teixeira L, Ferreira A, Ashburner M. The bacterial symbiont Wolbachia  
308 induces resistance to RNA viral infections in *Drosophila melanogaster*. *PLoS*  
309 *Biol.* 2008;6: e2. doi:10.1371/journal.pbio.1000002
- 310 9. Min KT, Benzer S. Wolbachia, normally a symbiont of *Drosophila*, can be  
311 virulent, causing degeneration and early death. *Proc Natl Acad Sci U S A.*  
312 1997;94: 10792–6.
- 313 10. Chrostek E, Marialva MSP, Esteves SS, Weinert LA, Martinez J, Jiggins FM,  
314 et al. Wolbachia variants induce differential protection to viruses in *Drosophila*  
315 *melanogaster*: a phenotypic and phylogenomic analysis. *PLoS Genet.* 2013;9:  
316 e1003896. doi:10.1371/journal.pgen.1003896
- 317 11. Woolfit M, Iturbe-Ormaetxe I, Brownlie JC, Walker T, Riegler M, Seleznev A,  
318 et al. Genomic Evolution of the Pathogenic Wolbachia Strain, wMelPop.  
319 *Genome Biol Evol.* 2013;5: 2189–204. doi:10.1093/gbe/evt169
- 320 12. Reynolds KT, Thomson LJ, Hoffmann AA. The effects of host age, host  
321 nuclear background and temperature on phenotypic effects of the virulent  
322 Wolbachia strain popcorn in *Drosophila melanogaster*. *Genetics.* 2003;164:  
323 1027–34.

- 324 13- Young BC, Wu Ch, Gordon NC, Cole K, Price JR, Liu E, et al. Severe  
325 infections emerge from commensal bacteria by adaptive evolution. *Elife*.  
326 2017;6: e30637. doi: 10.7554/eLife.30637
- 327 14. Rohrscheib CE, Frentiu FD, Horn E, Ritchie FK, Swinderen B Van, Ii MWW,  
328 et al. Intensity of Mutualism Breakdown Is Determined by Temperature Not  
329 Amplification of *Wolbachia* Genes. *PLoS Pathog*. 2016; 9: e1005888.  
330 doi:10.1371/journal.ppat.1005888
- 331 15. Chrostek E, Teixeira L. Comment on Rohrscheib et al . 2016 “ Intensity of  
332 mutualism breakdown is determined by temperature not amplification of  
333 *Wolbachia* genes .” *PLoS Pathog*. 2017; 13: e1006540.  
334 doi:10.1371/journal.ppat.1006540
- 335 16. Pfaffl MW. A new mathematical model for relative quantification in real-time  
336 RT-PCR. *Nucleic Acids Res*. 2001;29: e45.
- 337 17. D’haene B, Vandesompele J, Hellemans J. Accurate and objective copy  
338 number profiling using real-time quantitative PCR. *Methods*. 2010;50: 262–  
339 270. doi:10.1016/j.ymeth.2009.12.007
- 340 18. Team R. A language and environment for statistical computing. R Foundation  
341 for Statistical Computing, Vienna, Austria. 2012.
- 342 19. Wickham H. *ggplot2* Elegant Graphics for Data Analysis. Media. 2009.  
343 doi:10.1007/978-0-387-98141-3
- 344 20. Wood SN. Generalized additive models : an introduction with R. *Texts Stat*  
345 *Sci*. 2006; xvii, 392 . doi:10.1111/j.1541-0420.2007.00905\_3.x
- 346 21. Bates D, Machler, M, Bolker BM, Walker, SC. Fitting Linear Mixed-Effects  
347 Models using lme4. *Journal of Statistical Software*. 2015;67.  
348 doi:10.18637/jss.v067.i01

349

## 350 **Supporting information**

351

352 S1 Data – Relative levels of *WD0513* and *wsp* in single females carrying  
353 wMelPop.

354

355 S1 Text – R script with the statistical analysis of the data.

356
